# Supplementary material for: Identification of a novel senolytic agent, navitoclax, targeting the Bcl‐2 family of anti‐apoptotic factors
Source: PubMed Central journal article supplement (PMC4854923; doi:10.1111/acel.12445), 2016-03-18

TUNEL Assay

HUVECs

IMR90 cells

DAPI

TUNEL

DAPI

TUNEL

Vehicle

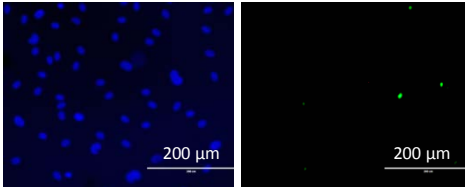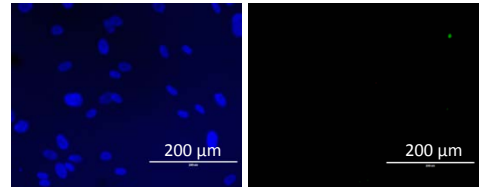

Senescent

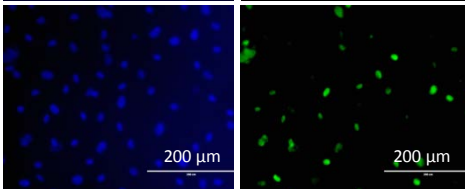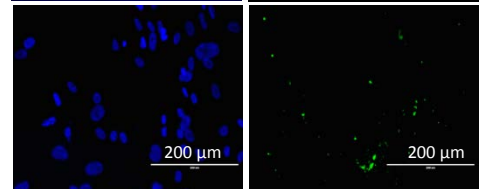

Proliferating

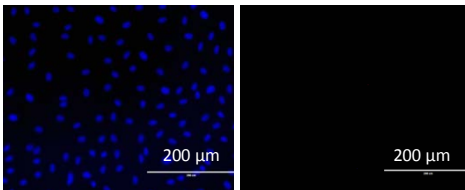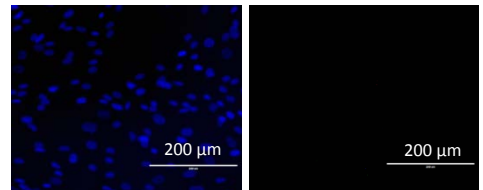

Supplemental Figure 2

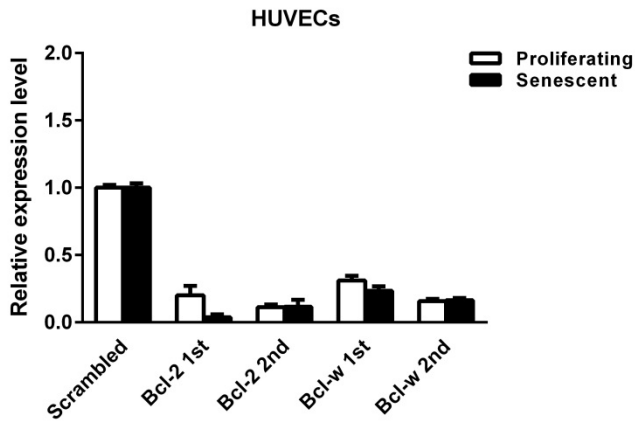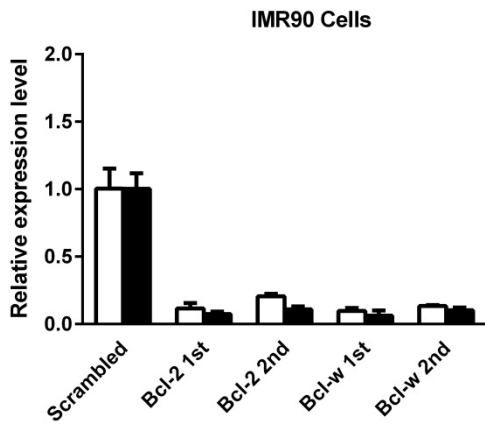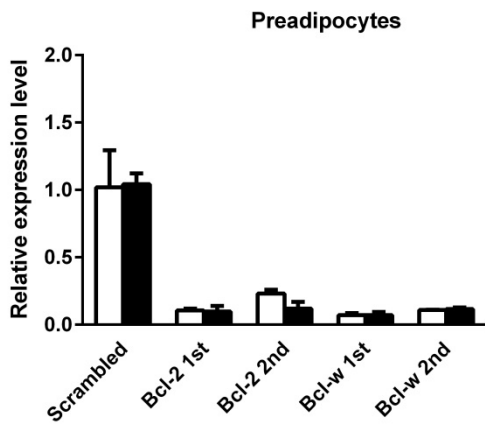

Supplemental Figure 3

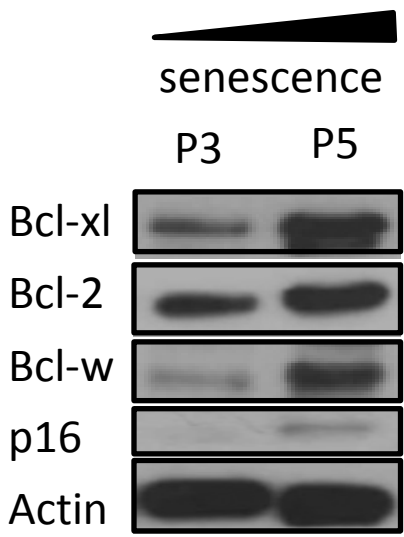

### HUVECs

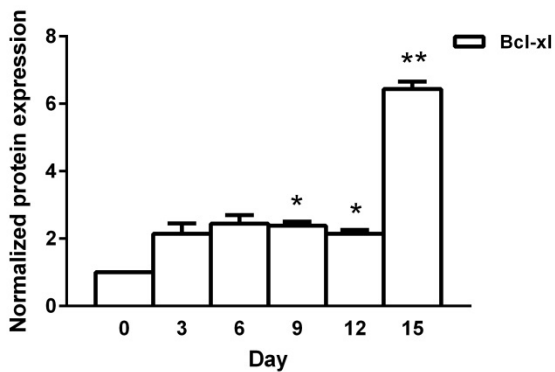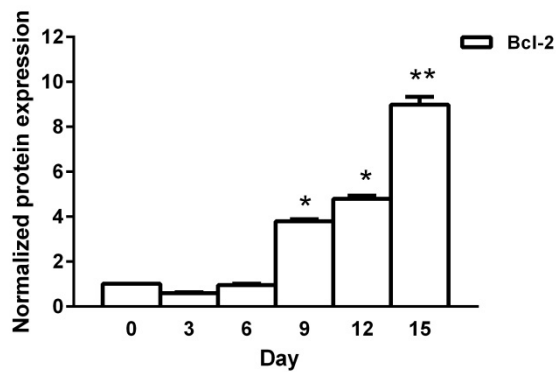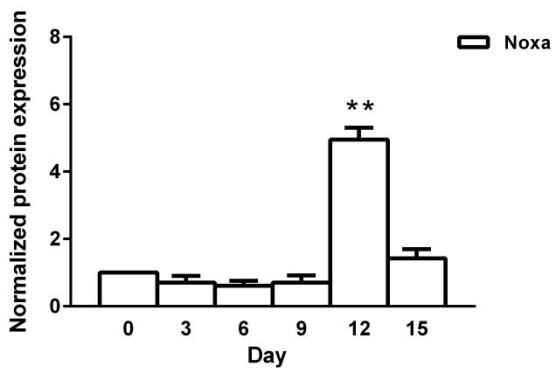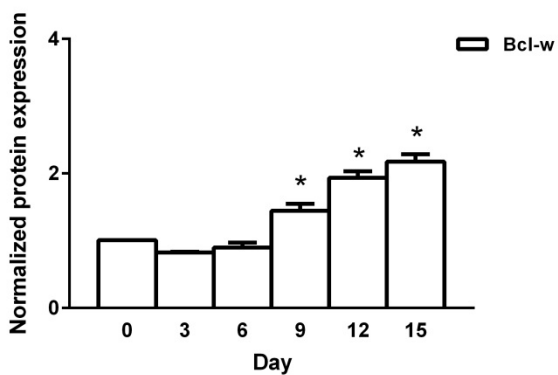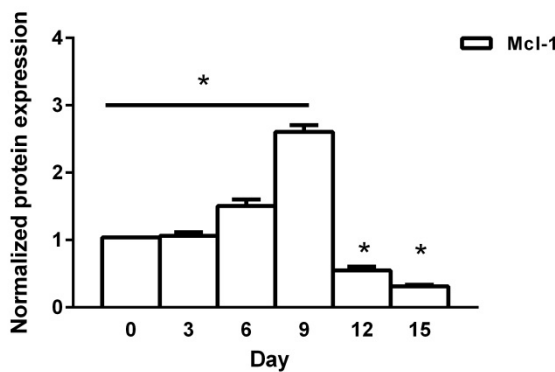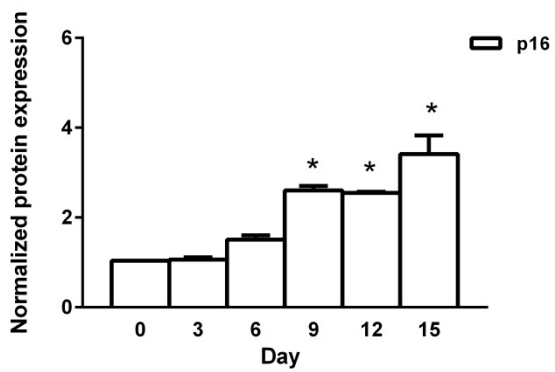

## IMR90 Cells

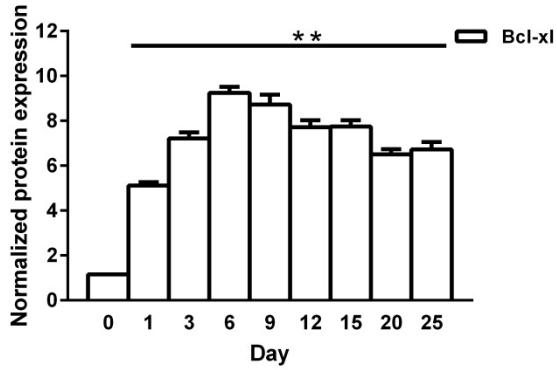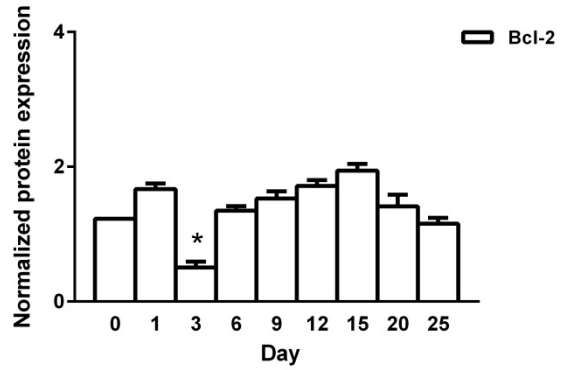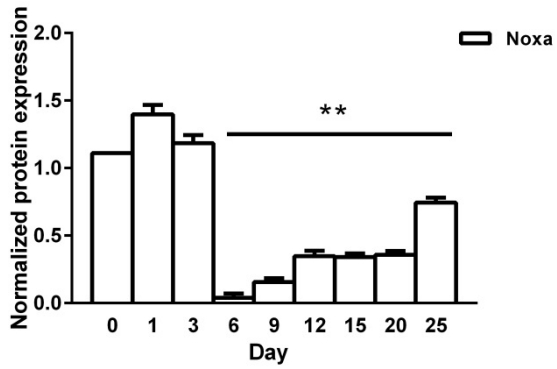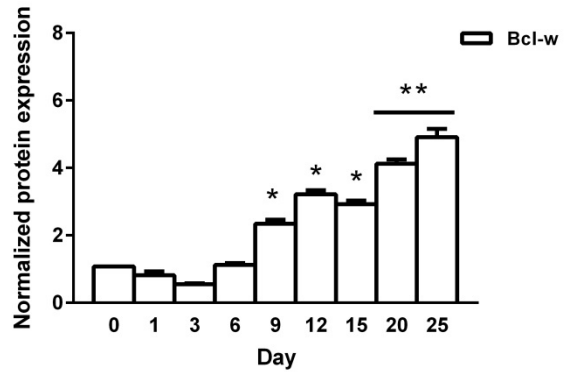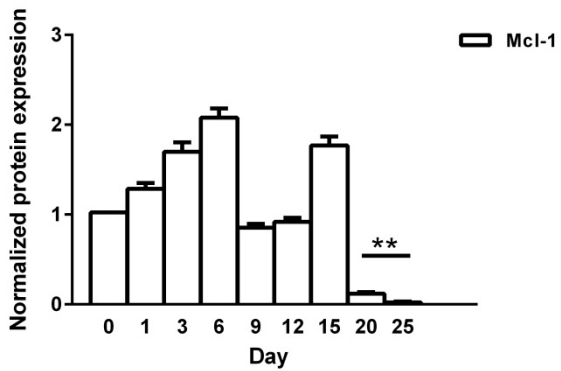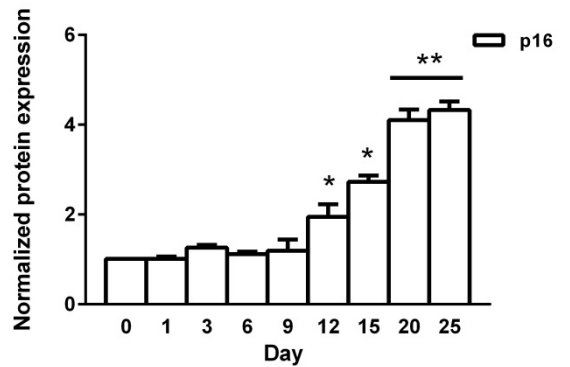

## Preadipocytes

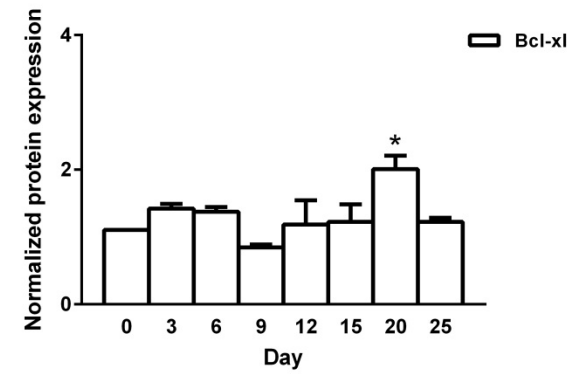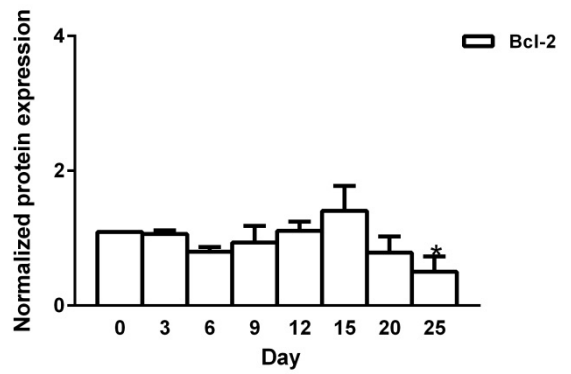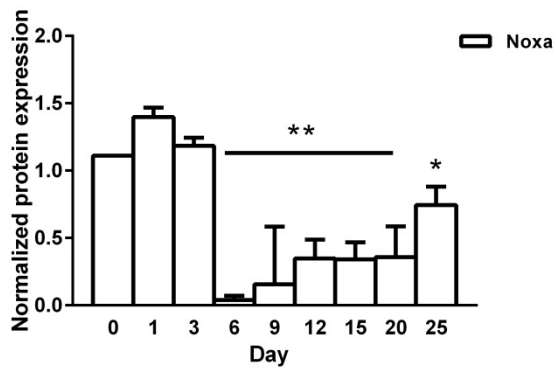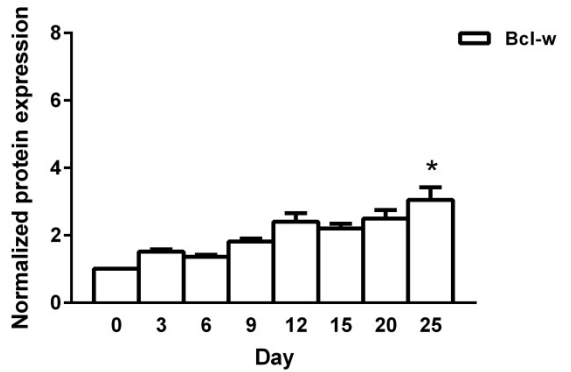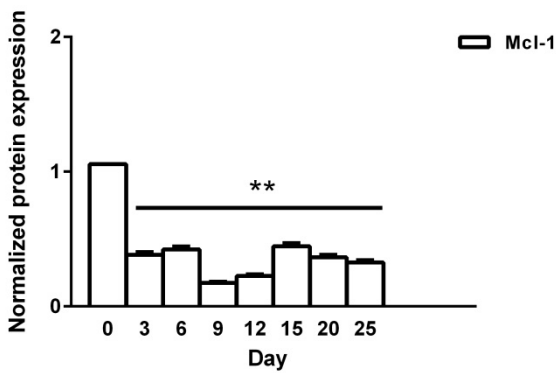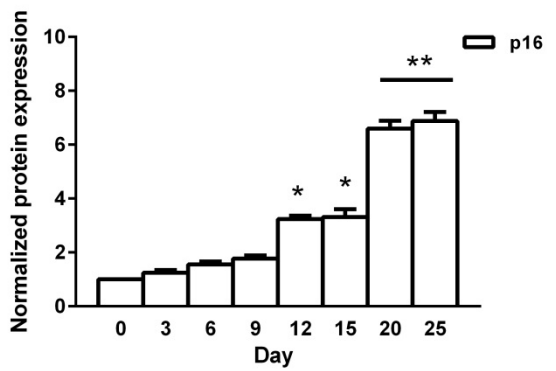

Supplement: ACEL-15-428-s001.pdf [file ACEL-15-428-s001.pdf]
